# Supplementary material for: Proteomic analysis of the copper resistance of Streptococcus pneumoniae
Source: Royal Society of Chemistry journal article supplement (doi:10.1039/c4mt00276h), 2015-01-01
Supplement: c4mt00276h1.pdf [file c4mt00276h1.pdf]

**Supplementary table 1. The detailed information of identified proteins.**

| NO. | Protein Name                              | Accession No. | Protein MW      | Protein PI | Protein score | Protein score | Total Ion score | Total Ion C. I. % |
|-----|-------------------------------------------|---------------|-----------------|------------|---------------|---------------|-----------------|-------------------|
| 1   | tyrosyl-tRNA synthetase                   | gi 116516055  | 47451.2         | 5.46       | 247           | 100           | 121             | 100               |
|     | Peptide Information                       |               |                 |            |               |               |                 |                   |
|     | Start Seq.                                | End Seq.      | Sequence        | Ion Score  | C. I. %       |               |                 |                   |
|     | 283                                       | 291           | QFEAAPHER       | 17         | 82.811        |               |                 |                   |
|     | 1                                         | 10            | MHIFDELKER      | 59         | 99.999        |               |                 |                   |
|     | 11                                        | 23            | GLIFQTTDEEALR   | 27         | 98.269        |               |                 |                   |
|     | 11                                        | 24            | GLIFQTTDEEALRI  | 18         | 84.432        |               |                 |                   |
| 2   | hypothetical protein SPD_0547             | gi 116516393  | 38188.1         | 5.26       | 265           | 100           | 106             | 100               |
|     | Peptide Information                       |               |                 |            |               |               |                 |                   |
|     | Start Seq.                                | End Seq.      | Sequence        | Ion Score  | C. I. %       |               |                 |                   |
|     | 31                                        | 41            | TLEGFGYQPVR     | 27         | 97.658        |               |                 |                   |
|     | 259                                       | 269           | DASGPYHYDFR     | 39         | 99.874        |               |                 |                   |
|     | 61                                        | 74            | YVTAHVDTLGAIVL  | 40         | 99.898        |               |                 |                   |
| 3   | catabolite control protein A              | gi 116517109  | 37020.2         | 5.47       | 245           | 100           | 93              | 100               |
|     | Peptide Information                       |               |                 |            |               |               |                 |                   |
|     | Start Seq.                                | End Seq.      | Sequence        | Ion Score  | C. I. %       |               |                 |                   |
|     | 224                                       | 235           | YSYDDGYALAER    | 75         | 100           |               |                 |                   |
|     | 1                                         | 14            | MNADDTVTIYDVAI  | 17         | 78.651        |               |                 |                   |
| 4   | glutamate dehydrogenase                   | gi 116516965  | 48936.7         | 5.43       | 698           | 100           | 514             | 100               |
|     | Peptide Information                       |               |                 |            |               |               |                 |                   |
|     | Start Seq.                                | End Seq.      | Sequence        | Ion Score  | C. I. %       |               |                 |                   |
|     | 66                                        | 74            | VPWVDRDGK       | 32         | 99.556        |               |                 |                   |
|     | 176                                       | 185           | EIGYLYGQYK      | 45         | 99.975        |               |                 |                   |
|     | 176                                       | 186           | EIGYLYGQYKR     | 61         | 100           |               |                 |                   |
|     | 98                                        | 108           | FHPTVNGGILK     | 72         | 100           |               |                 |                   |
|     | 43                                        | 54            | HPEYIEENILAR    | 68         | 100           |               |                 |                   |
|     | 158                                       | 175           | HIGPSLDVDPAGDI  | 154        | 100           |               |                 |                   |
|     | 371                                       | 390           | AAANAGVAVSALEI  | 82         | 100           |               |                 |                   |
| 5   | aromatic amino acid aminotransferase      | gi 116516139  | 43259.4         | 5.16       | 478           | 100           | 336             | 100               |
|     | Peptide Information                       |               |                 |            |               |               |                 |                   |
|     | Start Seq.                                | End Seq.      | Sequence        | Ion Score  | C. I. %       |               |                 |                   |
|     | 347                                       | 358           | AVAFIPGAAFGFR   | 68         | 100           |               |                 |                   |
|     | 186                                       | 196           | EQLEALAAVLR     | 75         | 100           |               |                 |                   |
|     | 346                                       | 358           | KAVAFIPGAAFGFR  | 18         | 87.877        |               |                 |                   |
|     | 10                                        | 20            | QLDKIQVSLIR     | 50         | 99.992        |               |                 |                   |
|     | 21                                        | 34            | QFDQVISEIPGVL   | 56         | 99.998        |               |                 |                   |
|     | 169                                       | 185           | AVILNYPANPTGI   | 69         | 100           |               |                 |                   |
| 6   | inositol-5-monophosphate dehydrogenase    | gi 116515965  | 52525.9         | 5.18       | 562           | 100           | 270             | 100               |
|     | Peptide Information                       |               |                 |            |               |               |                 |                   |
|     | Start Seq.                                | End Seq.      | Sequence        | Ion Score  | C. I. %       |               |                 |                   |
|     | 302                                       | 313           | VGIGPGSICTTR    | 33         | 99.444        |               |                 |                   |
|     | 277                                       | 290           | TLIAGNIATAEGAI  | 28         | 98.359        |               |                 |                   |
|     | 122                                       | 134           | ISGVPVVETLENR   | 39         | 99.868        |               |                 |                   |
|     | 122                                       | 135           | ISGVPVVETLENRI  | 16         | 70.958        |               |                 |                   |
|     | 209                                       | 222           | VIEFPNAAKDFEFGI | 83         | 100           |               |                 |                   |
|     | 223                                       | 238           | LLVAGAVGVTSDTI  | 26         | 97.314        |               |                 |                   |
|     | 314                                       | 334           | VIAGVGPVQTAI    | 47         | 99.979        |               |                 |                   |
| 7   | lactate oxidase                           | gi 116517149  | 41577.1         | 5.67       | 311           | 100           | 164             | 100               |
|     | Peptide Information                       |               |                 |            |               |               |                 |                   |
|     | Start Seq.                                | End Seq.      | Sequence        | Ion Score  | C. I. %       |               |                 |                   |
|     | 285                                       | 294           | VPIVFDGSGVR     | 19         | 82.041        |               |                 |                   |
|     | 284                                       | 294           | RVPIVFDGSGVR    | 20         | 87.998        |               |                 |                   |
|     | 94                                        | 105           | LANEQGEVATAR    | 18         | 79.333        |               |                 |                   |
|     | 284                                       | 295           | RVPIVFDGSGVRR   | 23         | 93.266        |               |                 |                   |
|     | 361                                       | 373           | HNPYNPTFPVDPR   | 38         | 99.798        |               |                 |                   |
|     | 246                                       | 262           | SLAAGASGIWVTNI  | 47         | 99.976        |               |                 |                   |
| 8   | recombinase A                             | gi 116516275  | 41923.9         | 5.13       | 129           | 100           | 35              | 99.525            |
|     | Peptide Information                       |               |                 |            |               |               |                 |                   |
|     | Start Seq.                                | End Seq.      | Sequence        | Ion Score  | C. I. %       |               |                 |                   |
|     | 200                                       | 209           | TIAIFINQLR      | 35         | 99.525        |               |                 |                   |
| 9   | aminopeptidase C                          | gi 116516913  | 50281.2         | 5.09       | 357           | 100           | 215             | 100               |
|     | Peptide Information                       |               |                 |            |               |               |                 |                   |
|     | Start Seq.                                | End Seq.      | Sequence        | Ion Score  | C. I. %       |               |                 |                   |
|     | 224                                       | 230           | KPDFAYR         | 55         | 99.997        |               |                 |                   |
|     | 292                                       | 299           | YINVPMER        | 39         | 99.887        |               |                 |                   |
|     | 241                                       | 250           | GITPQEFYKK      | 37         | 99.838        |               |                 |                   |
|     | 178                                       | 187           | LLRQDAQILR      | 32         | 99.428        |               |                 |                   |
|     | 275                                       | 288           | SYTVEMLGNVVGSI  | 52         | 99.995        |               |                 |                   |
| 10  | UDP-N-acetylglucosamine pyrophosphorylase | gi 116516172  | 49454.4         | 5.3        | 311           | 100           | 111             | 100               |
|     | Peptide Information                       |               |                 |            |               |               |                 |                   |
|     | Start Seq.                                | End Seq.      | Sequence        | Ion Score  | C. I. %       |               |                 |                   |
|     | 429                                       | 439           | DVPADAIAGR      | 47         | 99.987        |               |                 |                   |
|     | 141                                       | 151           | IVRNDNAEVLRL    | 21         | 94.832        |               |                 |                   |
|     | 167                                       | 179           | EINTGTYYVFDNER  | 17         | 88.107        |               |                 |                   |
|     | 123                                       | 140           | NVATILTAETDNPI  | 26         | 98.421        |               |                 |                   |
| 11  | acetyl-CoA carboxylase biotin carboxylase | gi 116515928  | 49862.3         | 5.16       | 226           | 100           | 91              | 100               |
|     | Peptide Information                       |               |                 |            |               |               |                 |                   |
|     | Start Seq.                                | End Seq.      | Sequence        | Ion Score  | C. I. %       |               |                 |                   |
|     | 284                                       | 293           | NFYFMMNTR       | 24         | 97.095        |               |                 |                   |
|     | 356                                       | 369           | ITNLYLPSGGVGLI  | 68         | 100           |               |                 |                   |
| 12  | glutamyl aminopeptidase PepA              | gi 116516201  | 38166.4         | 5.46       | 307           | 100           | 238             | 100               |
|     | Peptide Information                       |               |                 |            |               |               |                 |                   |
|     | Start Seq.                                | End Seq.      | Sequence        | Ion Score  | C. I. %       |               |                 |                   |
|     | 284                                       | 290           | YQYYCGK         | 12         | 18.471        |               |                 |                   |
|     | 10                                        | 25            | EVTELAAVSGHEAI  | 27         | 97.509        |               |                 |                   |
|     | 85                                        | 100           | VVEIGGWNPVVVS   | 82         | 100           |               |                 |                   |
|     | 107                                       | 124           | DGHEIPVISGSVPI  | 77         | 100           |               |                 |                   |
|     | 201                                       | 218           | LGNELYLGSNVQEI  | 41         | 99.914        |               |                 |                   |
| 13  | threonyl-tRNA synthetase                  | gi 116515338  | 74831.5         | 5.26       | 111           | 100           | 27              | 97.519            |
|     | Peptide Information                       |               |                 |            |               |               |                 |                   |
|     | Start Seq.                                | End Seq.      | Sequence        | Ion Score  | C. I. %       |               |                 |                   |
|     | 174                                       | 182           | QGEYVDLCR       | 14         | 52.868        |               |                 |                   |
|     | 1                                         | 12            | MINITFPDGAVR    | 14         | 44.257        |               |                 |                   |
| 14  | GTP-binding protein EngA                  | gi 116515879  | 49051.3         | 5.27       | 452           | 100           | 227             | 100               |
|     | Peptide Information                       |               |                 |            |               |               |                 |                   |
|     | Start Seq.                                | End Seq.      | Sequence        | Ion Score  | C. I. %       |               |                 |                   |
|     | 412                                       | 418           | FLENQIR         | 23         | 93.717        |               |                 |                   |
|     | 412                                       | 419           | FLENQIRK        | 20         | 86.19         |               |                 |                   |

|     |                                       |                |                 |           |         |        |           |
|-----|---------------------------------------|----------------|-----------------|-----------|---------|--------|-----------|
| 177 | 187                                   | FSLIGRPNVGK    | 20              | 85.639    |         |        |           |
| 28  | 39                                    | ISIVEDVEGVTR   | 46              | 99.97     |         |        |           |
| 94  | 105                                   | EGITDADEYVAR   | 39              | 99.823    |         |        |           |
| 2   | 16                                    | ALPTIAIVGRPNV  | 42              | 99.951    |         |        |           |
| 420 | 433                                   | AFVFEPTPIHLIAI | 37              | 99.846    |         |        |           |
| 15  | UDP-N-acetylglucosamine 1-carboxylase | gi 116516843   | 45922.9         | 5.38      | 55      | 99.336 | 35 99.732 |
|     | Peptide Information                   |                |                 |           |         |        |           |
|     | Start Seq.                            | End Seq.       | Sequence        | Ion Score | C. I. % |        |           |
|     | 97                                    | 108            | ASIVVLGPILAR    | 18        | 86.985  |        |           |
|     | 358                                   | 375            | IVGGQPLQGAEVL   | 17        | 83      |        |           |
| 16  | pneumolysin                           | gi 116515376   | 52923.9         | 5.14      | 543     | 100    | 349 100   |
|     | Peptide Information                   |                |                 |           |         |        |           |
|     | Start Seq.                            | End Seq.       | Sequence        | Ion Score | C. I. % |        |           |
|     | 289                                   | 301            | AVILGGDPSSGAR   | 18        | 78.992  |        |           |
|     | 20                                    | 31             | LLTHQGESIENR    | 27        | 97.686  |        |           |
|     | 307                                   | 319            | VDMVEDLIQEGSR   | 87        | 100     |        |           |
|     | 35                                    | 48             | EGNQLPDEFVVIIEI | 100       | 100     |        |           |
|     | 134                                   | 147            | WHQDYGVVNNVPAI  | 102       | 100     |        |           |
| 17  | pneumolysin                           | gi 116515376   | 52923.9         | 5.14      | 134     | 100    | 57 99.997 |
|     | Peptide Information                   |                |                 |           |         |        |           |
|     | Start Seq.                            | End Seq.       | Sequence        | Ion Score | C. I. % |        |           |
|     | 35                                    | 48             | EGNQLPDEFVVIIEI | 21        | 89.126  |        |           |
|     | 134                                   | 147            | WHQDYGVVNNVPAI  | 37        | 99.813  |        |           |
| 18  | cell division protein DivIVA          | gi 116515933   | 30223.4         | 4.63      | 57      | 99.618 | 26 97.652 |
|     | Peptide Information                   |                |                 |           |         |        |           |
|     | Start Seq.                            | End Seq.       | Sequence        | Ion Score | C. I. % |        |           |
|     | 89                                    | 102            | SNNIHHQAEQDAQI  | 17        | 82.593  |        |           |
| 19  | hypothetical protein SPD_0310         | gi 116516184   | 55087.5         | 5.51      | 153     | 100    | 46 99.97  |
|     | Peptide Information                   |                |                 |           |         |        |           |
|     | Start Seq.                            | End Seq.       | Sequence        | Ion Score | C. I. % |        |           |
|     | 38                                    | 46             | MLEDPHAAAR      | 18        | 81.682  |        |           |
|     | 85                                    | 97             | GDLGISYDQEVLR   | 27        | 97.863  |        |           |
| 20  | tyrosyl-tRNA synthetase               | gi 116516055   | 47451.2         | 5.46      | 48      | 97.102 |           |
| 21  | UDP-N-acetylmuramate-L-alanine        | gi 116515384   | 49842.7         | 5.43      | 243     | 100    | 134 100   |
|     | Peptide Information                   |                |                 |           |         |        |           |
|     | Start Seq.                            | End Seq.       | Sequence        | Ion Score | C. I. % |        |           |
|     | 240                                   | 251            | STIGSTFTVHFR    | 24        | 94.787  |        |           |
|     | 201                                   | 212            | GLFVYGEDAELR    | 38        | 99.793  |        |           |
|     | 148                                   | 158            | YFVFESEDEYER    | 35        | 99.642  |        |           |
|     | 201                                   | 213            | GLFVYGEDAELRK   | 20        | 88.855  |        |           |
|     | 252                                   | 265            | GQNLGQFHPTFGI   | 17        | 77.086  |        |           |
| 22  | 3-oxoacyl-(acyl carrier protein)      | gi 116516059   | 44075.1         | 5.44      | 143     | 100    | 112 100   |
|     | Peptide Information                   |                |                 |           |         |        |           |
|     | Start Seq.                            | End Seq.       | Sequence        | Ion Score | C. I. % |        |           |
|     | 114                                   | 121            | EIEDQVLR        | 19        | 87.69   |        |           |
|     | 218                                   | 226            | ASIPFDKDR       | 30        | 98.992  |        |           |
|     | 159                                   | 176            | SINTACSSSDAI    | 64        | 100     |        |           |
| 23  | hypothetical protein SPD_0310         | gi 116516184   | 55087.5         | 5.51      | 130     | 100    | 27 97.594 |
|     | Peptide Information                   |                |                 |           |         |        |           |
|     | Start Seq.                            | End Seq.       | Sequence        | Ion Score | C. I. % |        |           |
|     | 85                                    | 97             | GDLGISYDQEVLR   | 27        | 97.594  |        |           |
| 24  | metallo-beta-lactamase domain-c       | gi 116516160   | 61195           | 5.67      | 359     | 100    | 176 100   |
|     | Peptide Information                   |                |                 |           |         |        |           |
|     | Start Seq.                            | End Seq.       | Sequence        | Ion Score | C. I. % |        |           |
|     | 107                                   | 116            | GKLEEHGLLR      | 18        | 86.755  |        |           |
|     | 386                                   | 395            | YFMPVHGEYR      | 16        | 77.969  |        |           |
|     | 478                                   | 490            | SQMILSGPDLISR   | 34        | 99.606  |        |           |
|     | 168                                   | 181            | FDFTPVGEPADLHI  | 38        | 99.843  |        |           |
|     | 432                                   | 447            | IAGHFNAGDIYVDI  | 70        | 100     |        |           |
| 25  | adenylosuccinate synthetase           | gi 116515772   | 47711.6         | 5.49      | 697     | 100    | 473 100   |
|     | Peptide Information                   |                |                 |           |         |        |           |
|     | Start Seq.                            | End Seq.       | Sequence        | Ion Score | C. I. % |        |           |
|     | 408                                   | 417            | ISTFSVGPGR      | 30        | 99.109  |        |           |
|     | 147                                   | 157            | IADLKDIDFR      | 63        | 100     |        |           |
|     | 19                                    | 32             | ITDFLSANAIEVIAI | 89        | 100     |        |           |
|     | 291                                   | 304            | EVGHEYGTTGRPI   | 29        | 98.748  |        |           |
|     | 102                                   | 114            | AHVILPYHIELDR   | 60        | 100     |        |           |
|     | 272                                   | 288            | VGDGPFPELTFDEI  | 118       | 100     |        |           |
|     | 82                                    | 97             | ELSYLHEGVTTDI   | 84        | 100     |        |           |
| 26  | PTS system, mannose-specific II       | gi 116515792   | 35421.6         | 5.15      | 298     | 100    | 122 100   |
|     | Peptide Information                   |                |                 |           |         |        |           |
|     | Start Seq.                            | End Seq.       | Sequence        | Ion Score | C. I. % |        |           |
|     | 301                                   | 309            | DLGVEFDVR       | 41        | 99.912  |        |           |
|     | 231                                   | 239            | LIEISKDPR       | 13        | 48.834  |        |           |
|     | 196                                   | 210            | IIVASDNVAKDDL   | 21        | 92.415  |        |           |
|     | 240                                   | 257            | FGETHALILFETPI  | 48        | 99.982  |        |           |
| 27  | thiamine biosynthesis protein T       | gi 116516659   | 45232.3         | 5.37      | 102     | 100    |           |
| 28  | capsular polysaccharide biosynt       | gi 116516120   | 45833.4         | 5.33      | 223     | 100    | 50 99.995 |
|     | Peptide Information                   |                |                 |           |         |        |           |
|     | Start Seq.                            | End Seq.       | Sequence        | Ion Score | C. I. % |        |           |
|     | 319                                   | 327            | VEGVSLER        | 29        | 99.114  |        |           |
|     | 284                                   | 297            | DIVDRYDSGFAGSI  | 21        | 93.685  |        |           |
| 29  | Cof family protein/peptidyl-pro       | gi 116515578   | 52160.3         | 4.82      | 213     | 100    | 131 100   |
|     | Peptide Information                   |                |                 |           |         |        |           |
|     | Start Seq.                            | End Seq.       | Sequence        | Ion Score | C. I. % |        |           |
|     | 56                                    | 65             | GIFGVVPEIR      | 37        | 99.831  |        |           |
|     | 317                                   | 327            | DGYVDGVIFHR     | 53        | 99.994  |        |           |
|     | 14                                    | 24             | IVFFDIDTLR      | 41        | 99.899  |        |           |
| 31  | CTP synthetase                        | gi 116515581   | 59504.5         | 5.45      | 284     | 100    | 101 100   |
|     | Peptide Information                   |                |                 |           |         |        |           |
|     | Start Seq.                            | End Seq.       | Sequence        | Ion Score | C. I. % |        |           |
|     | 465                                   | 472            | YEFNNAFR        | 19        | 80.503  |        |           |
|     | 447                                   | 459            | AAAAAHNQEVVQR   | 25        | 95.889  |        |           |
|     | 473                                   | 490            | EQFEAAGFVFSGV   | 57        | 99.997  |        |           |
| 32  | sugar ABC transporter, ATP-bind       | gi 116515854   | 55029.2         | 5.47      | 162     | 100    | 27 97.43  |
|     | Peptide Information                   |                |                 |           |         |        |           |
|     | Start Seq.                            | End Seq.       | Sequence        | Ion Score | C. I. % |        |           |
|     | 433                                   | 445            | GLDVGAIIEYIHKR  | 18        | 85.984  |        |           |
|     | 417                                   | 432            | EIDRDPDLLIVSQI  | 10        | 18.414  |        |           |
| 33  | enoyl-CoA hydratase                   | gi 116516619   | 28831.2         | 5.84      | 175     | 100    | 85 100    |
|     | Peptide Information                   |                |                 |           |         |        |           |
|     | Start Seq.                            | End Seq.       | Sequence        | Ion Score | C. I. % |        |           |
|     | 83                                    | 93             | IAELVNTISYK     | 18        | 88.555  |        |           |
|     | 236                                   | 248            | SLAQTEDFKEGVR   | 66        | 100     |        |           |
| 34  | lysyl-tRNA synthetase                 | gi 116517090   | 56702.9         | 5.32      | 525     | 100    | 165 100   |
|     | Peptide Information                   |                |                 |           |         |        |           |
|     | Start Seq.                            | End Seq.       | Sequence        | Ion Score | C. I. % |        |           |
|     | 321                                   | 328            | VHMVDAIR        | 23        | 96.661  |        |           |

|                     |                                                        |                |           |         |     |     |           |
|---------------------|--------------------------------------------------------|----------------|-----------|---------|-----|-----|-----------|
| 165                 | 172                                                    | YLDLISNR       | 24        | 97.105  |     |     |           |
| 87                  | 95                                                     | EGQIQIYVR      | 19        | 90.055  |     |     |           |
| 151                 | 162                                                    | FHGLTDVETIYR   | 27        | 100     |     |     |           |
| 110                 | 124                                                    | ADLGDFLVGEGEVI | 38        | 100     |     |     |           |
| 416                 | 433                                                    | EYGNAFTELNDPII | 36        | 100     |     |     |           |
| 36                  | glyceraldehyde-3-phosphate dehydrogenase               | gi 116516523   | 51101.9   | 5.2     | 335 | 100 | 226 100   |
| Peptide Information |                                                        |                |           |         |     |     |           |
| Start Seq.          | End Seq.                                               | Sequence       | Ion Score | C. I. % |     |     |           |
| 109                 | 116                                                    | YAAEGLR        | 41        | 99.931  |     |     |           |
| 270                 | 282                                                    | QIVAGAFYSYGQR  | 56        | 99.998  |     |     |           |
| 221                 | 236                                                    | EVNFINFTGSTPII | 59        | 99.999  |     |     |           |
| 191                 | 208                                                    | AFEEAGIPAGVFN  | 71        | 100     |     |     |           |
| 37                  | ATP-dependent Clp protease ATP-binding subunit ClpX    | gi 116516310   | 84016.3   | 5.48    | 173 | 100 | 58 99.998 |
| Peptide Information |                                                        |                |           |         |     |     |           |
| Start Seq.          | End Seq.                                               | Sequence       | Ion Score | C. I. % |     |     |           |
| 142                 | 149                                                    | VIEILNRR       | 13        | 44.301  |     |     |           |
| 192                 | 204                                                    | LDVVSIVGQGTGIR | 18        | 81.976  |     |     |           |
| 258                 | 272                                                    | GELQLVGATTLNE  | 27        | 98.033  |     |     |           |
| 38                  | ribonucleotide-diphosphate reductase                   | gi 116516073   | 81825.9   | 5.32    | 357 | 100 | 200 100   |
| Peptide Information |                                                        |                |           |         |     |     |           |
| Start Seq.          | End Seq.                                               | Sequence       | Ion Score | C. I. % |     |     |           |
| 197                 | 209                                                    | IGGGVGITLSNLR  | 45        | 99.955  |     |     |           |
| 151                 | 163                                                    | YQPATPSFLNAGR  | 65        | 100     |     |     |           |
| 563                 | 575                                                    | DKVQEDGLYHQNR  | 17        | 74.009  |     |     |           |
| 231                 | 245                                                    | LFEDSFYSNQLG   | 47        | 99.972  |     |     |           |
| 351                 | 368                                                    | LQQESGYPPVVNI  | 26        | 96.173  |     |     |           |
| 39                  | ATP-dependent Clp protease ATP-binding subunit ClpX    | gi 116516310   | 84016.3   | 5.48    | 142 | 100 | 17 74.009 |
| Peptide Information |                                                        |                |           |         |     |     |           |
| Start Seq.          | End Seq.                                               | Sequence       | Ion Score | C. I. % |     |     |           |
| 258                 | 272                                                    | GELQLVGATTLNE  | 17        | 86.347  |     |     |           |
| 40                  | phosphoglucosyltransferase/phosphomannosyltransferase  | gi 116516422   | 48092.6   | 4.65    | 256 | 100 | 60 100    |
| Peptide Information |                                                        |                |           |         |     |     |           |
| Start Seq.          | End Seq.                                               | Sequence       | Ion Score | C. I. % |     |     |           |
| 409                 | 421                                                    | ILVRPSGTEPLLR  | 25        | 97.772  |     |     |           |
| 230                 | 245                                                    | ESGSAIGLAFDGD  | 27        | 98.368  |     |     |           |
| 41                  | metallo-beta-lactamase superfamily class B             | gi 116516084   | 61128     | 5.38    | 303 | 100 | 138 100   |
| Peptide Information |                                                        |                |           |         |     |     |           |
| Start Seq.          | End Seq.                                               | Sequence       | Ion Score | C. I. % |     |     |           |
| 534                 | 540                                                    | YLPDQTK        | 30        | 99.274  |     |     |           |
| 382                 | 391                                                    | YLPVQGEYR      | 37        | 99.78   |     |     |           |
| 249                 | 261                                                    | IVLTGFDIENIVR  | 27        | 97.873  |     |     |           |
| 286                 | 298                                                    | FEDHELIILETGR  | 45        | 99.96   |     |     |           |
| 42                  | ribose-phosphate pyrophosphokinase                     | gi 116517035   | 35331.5   | 5.93    | 357 | 100 | 246 100   |
| Peptide Information |                                                        |                |           |         |     |     |           |
| Start Seq.          | End Seq.                                               | Sequence       | Ion Score | C. I. % |     |     |           |
| 218                 | 229                                                    | AILIDDLNTGR    | 64        | 100     |     |     |           |
| 217                 | 229                                                    | KAILIDDLNTGR   | 18        | 82.412  |     |     |           |
| 37                  | 52                                                     | QFSDGEIQVNIEE  | 21        | 91.601  |     |     |           |
| 83                  | 99                                                     | ASAHSINVLPPYF  | 83        | 100     |     |     |           |
| 286                 | 302                                                    | NVCYITASELIGD  | 54        | 99.996  |     |     |           |
| 43                  | putative manganese-dependent inorganic pyrophosphatase | gi 116516825   | 33457.9   | 4.57    | 249 | 100 | 217 100   |
| Peptide Information |                                                        |                |           |         |     |     |           |
| Start Seq.          | End Seq.                                               | Sequence       | Ion Score | C. I. % |     |     |           |
| 115                 | 127                                                    | LEPVGSAIVYR    | 77        | 100     |     |     |           |
| 102                 | 114                                                    | VANFETASPLYMR  | 61        | 100     |     |     |           |
| 218                 | 232                                                    | VAQVNTVDIAEVL  | 180       | 100     |     |     |           |
| 44                  | DNA-directed RNA polymerase subunit beta               | gi 116516293   | 34242.8   | 4.64    | 164 | 100 | 70 100    |
| Peptide Information |                                                        |                |           |         |     |     |           |
| Start Seq.          | End Seq.                                               | Sequence       | Ion Score | C. I. % |     |     |           |
| 21                  | 28                                                     | FVIEPLER       | 21        | 76.645  |     |     |           |
| 174                 | 182                                                    | VNYQVEPAR      | 31        | 97.643  |     |     |           |
| 250                 | 259                                                    | TIEELDLSVR     | 18        | 56.309  |     |     |           |
| 45                  | proline dipeptidase PepQ                               | gi 116516123   | 40347.3   | 4.73    | 101 | 100 | 76 100    |
| Peptide Information |                                                        |                |           |         |     |     |           |
| Start Seq.          | End Seq.                                               | Sequence       | Ion Score | C. I. % |     |     |           |
| 281                 | 290                                                    | AGYGEYFNHR     | 40        | 99.849  |     |     |           |
| 87                  | 96                                                     | HALPQLDFKR     | 18        | 75.153  |     |     |           |
| 114                 | 127                                                    | TVFETAEDNLTPI  | 17        | 70.941  |     |     |           |
| 46                  | amino acid ABC transporter, ATP-binding subunit        | gi 116516709   | 27350.4   | 6.01    | 240 | 100 | 147 100   |
| Peptide Information |                                                        |                |           |         |     |     |           |
| Start Seq.          | End Seq.                                               | Sequence       | Ion Score | C. I. % |     |     |           |
| 70                  | 79                                                     | ITQEILALR      | 40        | 99.878  |     |     |           |
| 235                 | 244                                                    | TKEFFASYKR     | 27        | 97.486  |     |     |           |
| 127                 | 138                                                    | VGLSDRENHYPR   | 63        | 100     |     |     |           |
| 217                 | 234                                                    | IIESGTPDEIHTI  | 17        | 73.004  |     |     |           |
