# Supplementary material for: Proteomic analysis of the copper resistance of Streptococcus pneumoniae
Source: Royal Society of Chemistry journal article supplement (doi:10.1039/c4mt00276h), 2015-01-01
Supplement: c4mt00276h2.pdf [file c4mt00276h2.pdf]

Supplementary table 2. Cu-binding motifs in the differentially expressed proteins.

| Protein name                                           | Gene name       | Cu-binding motifs                                                                                                                                           |
|--------------------------------------------------------|-----------------|-------------------------------------------------------------------------------------------------------------------------------------------------------------|
| tyrosyl-tRNA synthetase                                | <i>tyrS</i>     | H(x) <sub>2</sub> H M(X) <sub>0</sub> H                                                                                                                     |
| hypothetical protein SPD_0547                          | <i>SPD_0547</i> | H(X) <sub>4,5,10</sub> H H(X) <sub>9</sub> M M(X) <sub>7,8</sub> H H(X) <sub>3</sub> C C(X) <sub>2</sub> H                                                  |
| catabolite control protein A                           | <i>ccpA</i>     | M(X) <sub>0,2,5,7</sub> H                                                                                                                                   |
| glutamate dehydrogenase                                | <i>gdhA</i>     | M(X) <sub>5</sub> H C(X) <sub>9</sub> H                                                                                                                     |
| aromatic amino acid aminotransferase                   | <i>araT</i>     | H(X) <sub>1,5,9</sub> M M(X) <sub>2</sub> H                                                                                                                 |
| inosine 5'-monophosphate dehydrogenase                 | <i>guaB</i>     | H(X) <sub>1</sub> H H(X) <sub>0,2,7,8</sub> M M(X) <sub>8,10</sub> H                                                                                        |
| lactate oxidase                                        | <i>lctO</i>     | H(X) <sub>4,5</sub> H H(X) <sub>1,8</sub> M M(X) <sub>5,9</sub> H H(X) <sub>2,8</sub> C                                                                     |
| recombinase A                                          | <i>recA</i>     | H(X) <sub>6,7</sub> M M(X) <sub>12</sub> M                                                                                                                  |
| aminopeptidase C                                       | <i>pepC</i>     | H(X) <sub>1</sub> M M(X) <sub>1,8</sub> H                                                                                                                   |
| glucosamine-1-phosphate acetyltransferase              | <i>glmU</i>     | H(X) <sub>0,1,2,9,11</sub> H H(X) <sub>0,2,3,6</sub> M M(X) <sub>2,5,7,8,10</sub> H H(X) <sub>6</sub> C M(X) <sub>8</sub> M                                 |
| acetyl-CoA carboxylase biotin carboxylase subunit      | <i>accC</i>     | H(X) <sub>1,2,4,9,11</sub> H H(X) <sub>1,3,4,8,10</sub> M M(X) <sub>6,7,9,10</sub> H H(X) <sub>3,5,8,10</sub> C M(X) <sub>12</sub> M                        |
| glutamyl aminopeptidase PepA                           | <i>pepA</i>     | H(X) <sub>1,11</sub> H H(X) <sub>0,5,6,7,9</sub> M C(X) <sub>4,6</sub> H                                                                                    |
| threonyl-tRNA synthetase                               | <i>thrS</i>     | H(X) <sub>0,1,2,3,5,6,7,8,9,10,11,12</sub> H H(X) <sub>3,4,6,7,8,10</sub> M M(X) <sub>0,1,3,4,5,8,10</sub> H C(X) <sub>2,3,9</sub> H M(X) <sub>8,12</sub> M |
| GTP-binding protein EngA                               | <i>engA</i>     | H(X) <sub>1,4,5,10</sub> M M(X) <sub>0,4</sub> H                                                                                                            |
| UDP-N-acetylglucosamine 1-carboxyvinyltransferase      | <i>murA-2</i>   | H(X) <sub>2,5,8,9</sub> H H(X) <sub>2,3,4,5,6,10</sub> M M(X) <sub>2,5,10</sub> H H(X) <sub>8</sub> C C(X) <sub>9</sub> H M(X) <sub>8,12</sub> M            |
| pneumolysin                                            | <i>ply</i>      | H(X) <sub>1</sub> M M(X) <sub>7,9</sub> H                                                                                                                   |
| cell division protein DivIVA                           | <i>divIVA</i>   | H(X) <sub>7</sub> H M(X) <sub>8</sub> M                                                                                                                     |
| hypothetical protein SPD_0310                          | <i>SPD_0310</i> | H(X) <sub>0,8,11</sub> H H(X) <sub>5,9</sub> M M(X) <sub>1,4</sub> H M(X) <sub>8</sub> M                                                                    |
| UDP-N-acetylmuramate--L-alanine ligase                 | <i>murC</i>     | H(X) <sub>0,3,4,6,9,10,11</sub> H H(X) <sub>1,2,6,7,8,9</sub> M M(X) <sub>1,2,4,5,6,7</sub> H                                                               |
| 3-oxoacyl-(acyl carrier protein) synthase II           | <i>fabF</i>     | H(X) <sub>4,5</sub> H H(X) <sub>0,4,9</sub> M M(X) <sub>1,3,7</sub> H C(X) <sub>3</sub> H M(X) <sub>8</sub> M                                               |
| metallo-beta-lactamase domain-containing protein       | <i>SPD_0130</i> | H(X) <sub>1,2,3,4,6,8,10,12</sub> H H(X) <sub>1,4,8</sub> M M(X) <sub>2,3,10</sub> H H(X) <sub>7,11</sub> C                                                 |
| adenylosuccinate synthetase                            | <i>purA</i>     | H(X) <sub>5,11</sub> H M(X) <sub>1</sub> H                                                                                                                  |
| PTS system mannose-specific transporter subunit IIAB   | <i>manL</i>     | H(X) <sub>7</sub> H H(X) <sub>4</sub> M M(X) <sub>1,8</sub> H                                                                                               |
| thiamine biosynthesis protein ThiI                     | <i>thiI</i>     | M(X) <sub>10</sub> H                                                                                                                                        |
| capsular polysaccharide biosynthesis protein           | <i>SPD_1619</i> | H(X) <sub>3,9</sub> H H(X) <sub>6,9</sub> M M(X) <sub>9,10</sub> H C(X) <sub>4</sub> H                                                                      |
| Cof family protein/peptidyl-prolyl cis-trans isomerase | <i>SPD_1367</i> | H(X) <sub>1,4,10</sub> H H(X) <sub>6,7,8,9,10</sub> M M(X) <sub>3,5,10</sub> H                                                                              |
| CTP synthetase                                         | <i>pyrG</i>     | H(X) <sub>1,8,10</sub> H H(X) <sub>9</sub> M M(X) <sub>2,4,6,9</sub> H C(X) <sub>2</sub> H M(X) <sub>8</sub> M                                              |
| sugar ABC transporter ATP-binding protein              | <i>SPD_0740</i> | H(X) <sub>1,5,6,10</sub> H H(X) <sub>1,3,5,7,8</sub> M M(X) <sub>1,3</sub> H                                                                                |
| enoyl-CoA hydratase                                    | <i>SPD_0378</i> | H(X) <sub>2</sub> M M(X) <sub>1</sub> H H(X) <sub>3</sub> C M(X) <sub>12</sub> M                                                                            |
| lysyl-tRNA synthetase                                  | <i>lysS</i>     | H(X) <sub>0,2,5,12</sub> H H(X) <sub>0,6,7,8</sub> M M(X) <sub>3,8</sub> H                                                                                  |
| glyceraldehyde-3-phosphate dehydrogenase               | <i>gapN</i>     | M(X) <sub>8</sub> M                                                                                                                                         |
| ATP-dependent Clp protease ATP-binding subunit ClpE    | <i>clpE</i>     | H(X) <sub>0,4,7</sub> H H(X) <sub>0,3,5</sub> M M(X) <sub>0,2,6</sub> H M(X) <sub>8</sub> M C(X) <sub>2</sub> C                                             |

|                                                    |                 |                                                                       |
|----------------------------------------------------|-----------------|-----------------------------------------------------------------------|
| ribonucleotide-diphosphate reductase subunit alpha | <i>nrdE</i>     | $H(X)_{5,8,9}H$ $H(X)_{6,10}M$ $M(X)_{1,2,3}H$ $M(X)_{12}M$ $C(X)_2C$ |
| phosphoglucosamine mutase                          | <i>glmM</i>     | $H(X)_3M$ $M(X)_{4,5}H$                                               |
| metallo-beta-lactamase superfamily protein         | <i>SPD_0533</i> | $H(X)_{1,3}H$ $H(X)_{4,8,9}M$ $M(X)_{4,5}H$                           |
| ribose-phosphate pyrophosphokinase                 | <i>prs2</i>     | $H(X)_{1,6}M$ $M(X)_9H$ $H(X)_{1,10}C$                                |
| manganese-dependent inorganic pyrophosphatase      | <i>ppaC</i>     | $H(X)_0H$ $M(X)_{3,7}H$                                               |
| DNA-directed RNA polymerase subunit alpha          | <i>rpoA</i>     | $H(X)_{9,10}M$ $C(X)_9H$                                              |
| proline dipeptidase PepQ                           | <i>pepQ</i>     | $H(X)_{3,6,10}H$ $H(X)_{3,5,7,10}M$ $M(X)_{2,10}H$ $M(X)_{8,12}M$     |
| amino acid ABC transporter ATP-binding protein     | <i>glnQ</i>     | $H(X)_3H$ $H(X)_1M$ $M(X)_4H$                                         |
